# Supplementary material for: Inhibitory Role of Growth Hormone in the Induction and Progression Phases of Collagen-Induced Arthritis
Source: PubMed Central journal article supplement (PMC5980961; doi:10.3389/fimmu.2018.01165), 2018-05-25
Supplement: Image_1.pdf [file Image_1.pdf]

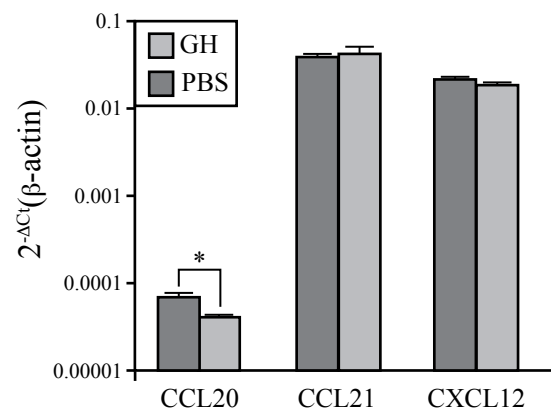

**Figure S1 . Effects of rhGH administration the Expression of chemokines in peripheral LNs of arthritic mice.** Chemokine mRNA from GH-treated arthritic DBA/1J and control mice was quantified by qRT-PCR. Expression is normalized to b-actin and expressed as  $2^{-\Delta C_t}$ . Data shown as mean  $\pm$  SD ( $n = 12$ ). Student's t-test \* $p \leq 0.05$ .
